# Supplementary material for: High-speed AFM imaging reveals DNA capture and loop extrusion dynamics by cohesin-NIPBL
Source: PubMed Central journal article supplement — J Biol Chem. 2023 Sep 28;299(11):105296. doi: 10.1016/j.jbc.2023.105296 (PMC10656236; doi:10.1016/j.jbc.2023.105296), 2023-09-28
Supplement: mmc1.pdf [file mmc1.pdf]

# Supporting Information

## High-speed AFM imaging reveals DNA capture and loop extrusion dynamics by cohesin-NIPBL

Parminder Kaur<sup>1,2,\*</sup>, Xiaotong Lu<sup>3</sup>, Qi Xu<sup>4,5</sup>, Elizabeth Marie Irvin<sup>6</sup>, Colette Pappas<sup>7</sup>,  
Hongshan Zhang<sup>8</sup>, Ilya J. Finkelstein<sup>8</sup>, Zhubing Shi<sup>4,5</sup>, Yizhi Jane Tao<sup>3</sup>, Hongtao Yu<sup>4,5</sup>,  
Hong Wang<sup>1,2,6,\*</sup>

<sup>1</sup>Physics Department, <sup>2</sup>Center for Human Health and the Environment, <sup>6</sup>Toxicology Program, <sup>7</sup>Biological Sciences, North Carolina State University, Raleigh, NC, USA

<sup>3</sup>Department of BioSciences, Rice University, Houston, TX, USA

<sup>4</sup>Westlake Laboratory of Life Sciences and Biomedicine, <sup>5</sup>School of Life Sciences, Westlake University, Hangzhou, Zhejiang Province, P.R. China

<sup>8</sup>Department of Molecular Biosciences, <sup>9</sup>Institute for Cellular and Molecular Biology, University of Texas at Austin, Austin, TX, USA

**Video S1. HS-AFM video showing dynamics of the WT cohesin<sup>SA1</sup>-NIPBL<sup>c</sup> and extension of the arm-hinge domain to capture a DNA segment in proximity (4 mM ATP). Related to Figure 3B.**

**Video S2. HS-AFM video showing that a DNA-bound WT cohesin<sup>SA1</sup>-NIPBL<sup>c</sup> complex captures a DNA segment in proximity through the arm-hinge domain and initiates a DNA loop (4 mM ATP). Related to Figure 4 (II to VII).**

**Video S3. HS-AFM video showing dynamics of cohesin<sup>SA1</sup>-NIPBL<sup>c</sup> ATPase mutant and diffusion on DNA through short protrusions (4 mM ATP). Related to Figures 5A and S5.**

**Video S4. HS-AFM video demonstrating diffusion on DNA through short protrusions and arm extension by the cohesin<sup>SA1</sup>-NIPBL<sup>c</sup> ATPase mutant (4 mM ATP). Related to Figure 5B.**

**Video S5. HS-AFM video showing DNA capture by the cohesin<sup>SA1</sup>-NIPBL<sup>c</sup> ATPase mutant through arm extension (4 mM ATP). Related to Figure 5C.**

**Video S6. HS-AFM video showing DNA loop extrusion by WT cohesin<sup>SA1</sup>-NIPBL<sup>c</sup> (4 mM ATP). Related to Figure 7C.**

**Video S7. HS-AFM video showing DNA loop extrusion by WT cohesin<sup>SA1</sup>-NIPBL<sup>c</sup> (4 mM ATP). Related to Figure 7D.**

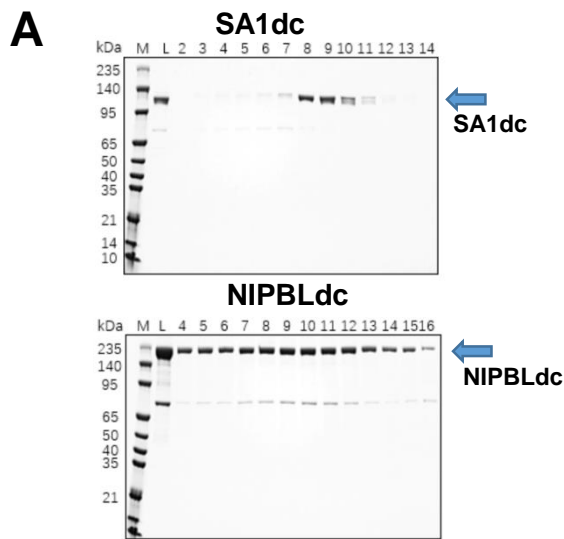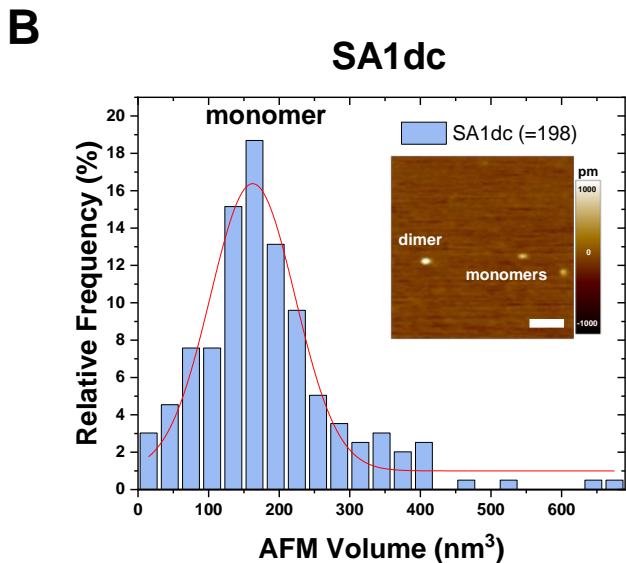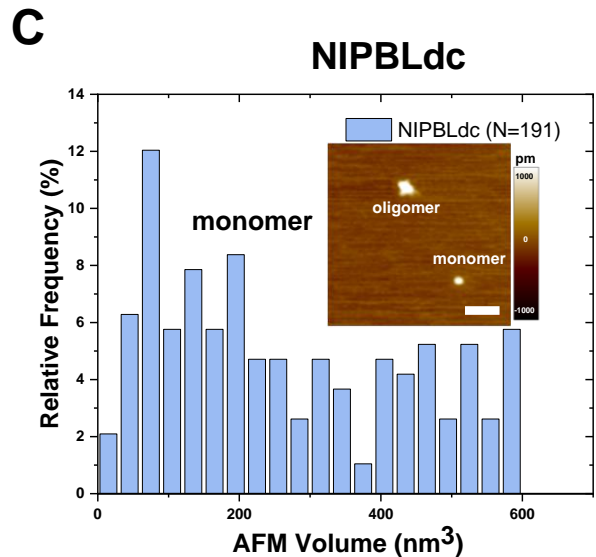

**Figure S1. AFM volume analysis of SA1dc and NIPBLdc.** A, SDS-PAGE of purified SA1dc and NIPBLdc. M: molecular marker. L: load. Numbers are fractions from the last FPLC purification step. B and C, Histograms of AFM volumes of SA1dc (B) and NIPBLdc (C,  $<600 \text{ nm}^3$ ). The red line represents Gaussian fit to the data with the peak centered at  $162 \text{ nm}^3 \pm 120 \text{ nm}^3$  ( $R^2 > 0.90$ ) for SA1dc. Based on the peak, the estimation of the molecular weight is 133 KDa for SA1dc, which is close to monomers. This estimation is based on a previously established calibration curve:  $V (\text{nm}^3) = 1.45 MW - 21.57$ , where  $V$  is AFM volume and  $MW$  is molecular weight (Kaur et al. Scientific Reports, 2016). Inserts show example AFM images. The complexes with volumes greater than  $300 \text{ nm}^3$  are treated as dimers and higher-order complexes. XY scale bar represents 100 nm.

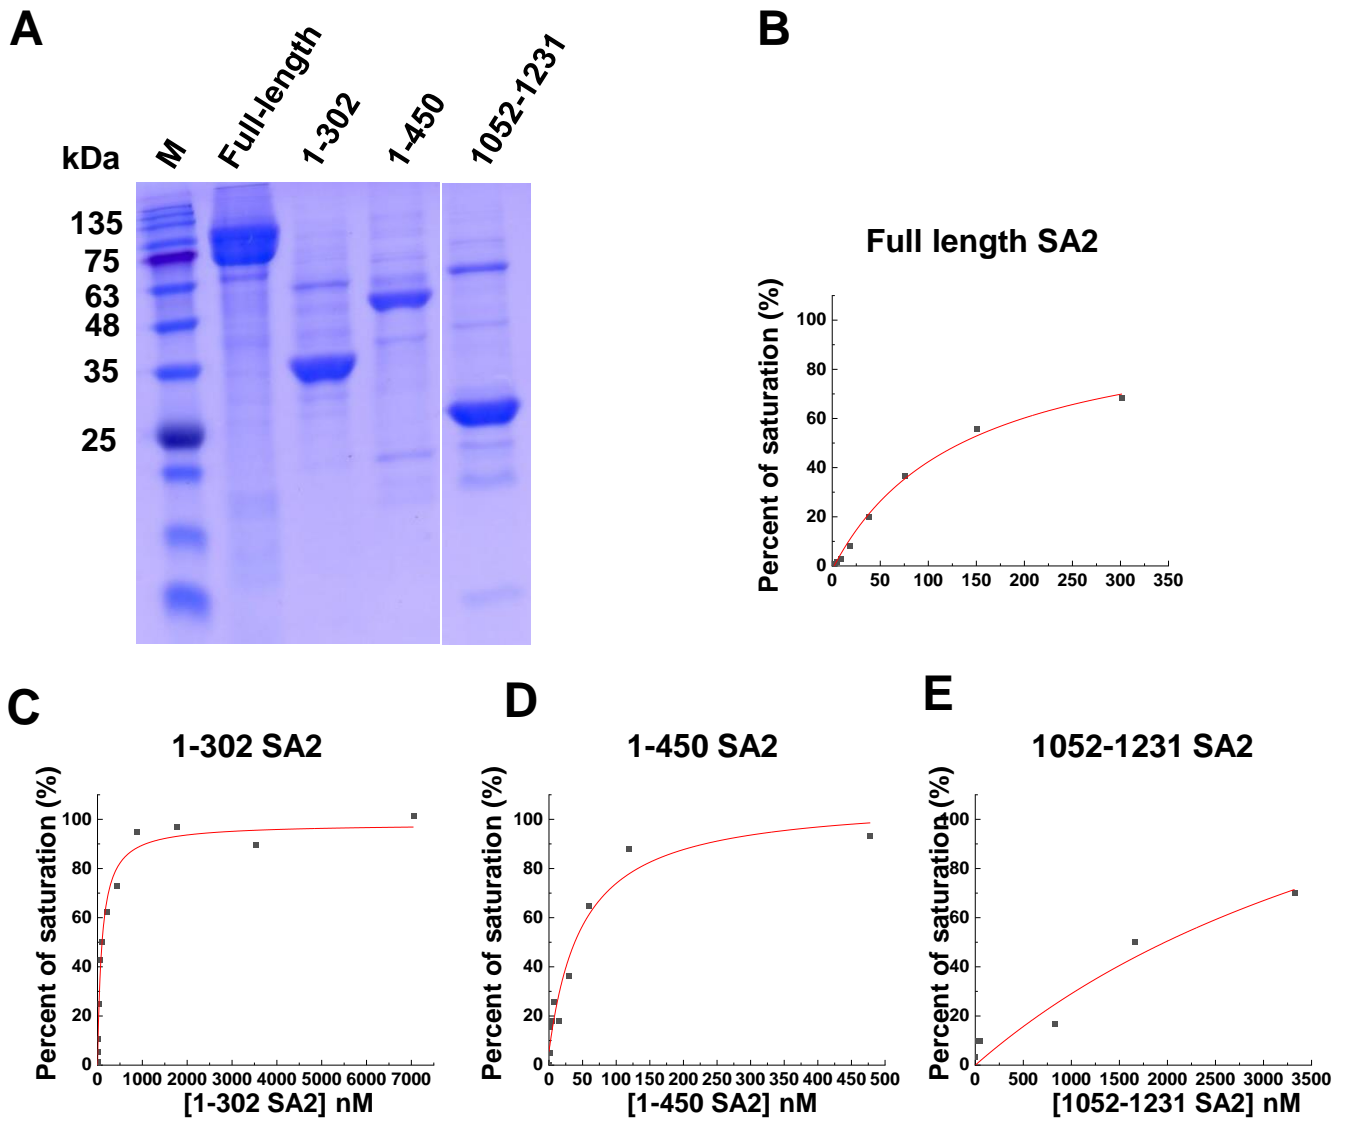

**Figure S2. DNA binding by the full-length and truncation mutants of SA2.** A, SDS-PAGE of the SA2 full length (1-1231 AAs), 1-302 AAs, 1-450 AAs, and 1052-1231 AAs. M: Molecular weight marker. The picture is cut from the same gel. B to E, Binding of the full length (B), 1-302 (C), 1-450 (D), and 1052-1231 (E) SA2 to 45 bp dsDNA measured by fluorescence anisotropy. dsDNA is labeled with Alexa 488. The data were fitted to the law of mass action (red lines,  $R^2 > 0.9$ ).

**A**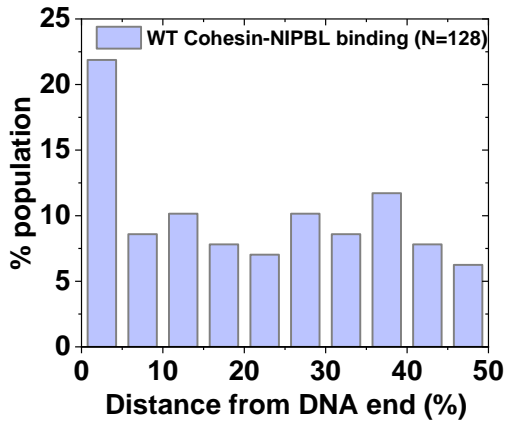**B**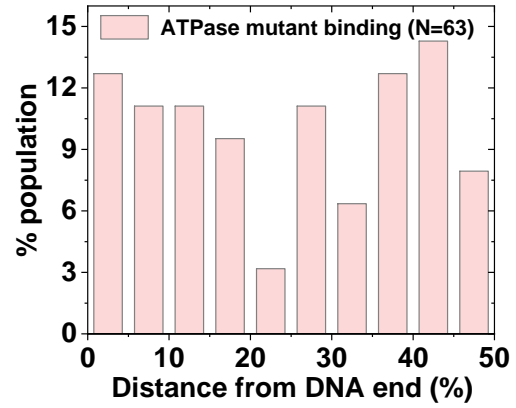

**Figure S3. DNA binding position distributions of WT and ATPase mutant cohesin<sup>SA1</sup>-NIPBL<sup>c</sup> on linear dsDNA.** *A* and *B*, Position distributions of WT (*A*) and ATPase mutant (*B*) cohesin<sup>SA1</sup>-NIPBL<sup>c</sup> on a linear dsDNA substrate (5.19 kb). Two independent experiments in the presence of 2.5 mM ATP.

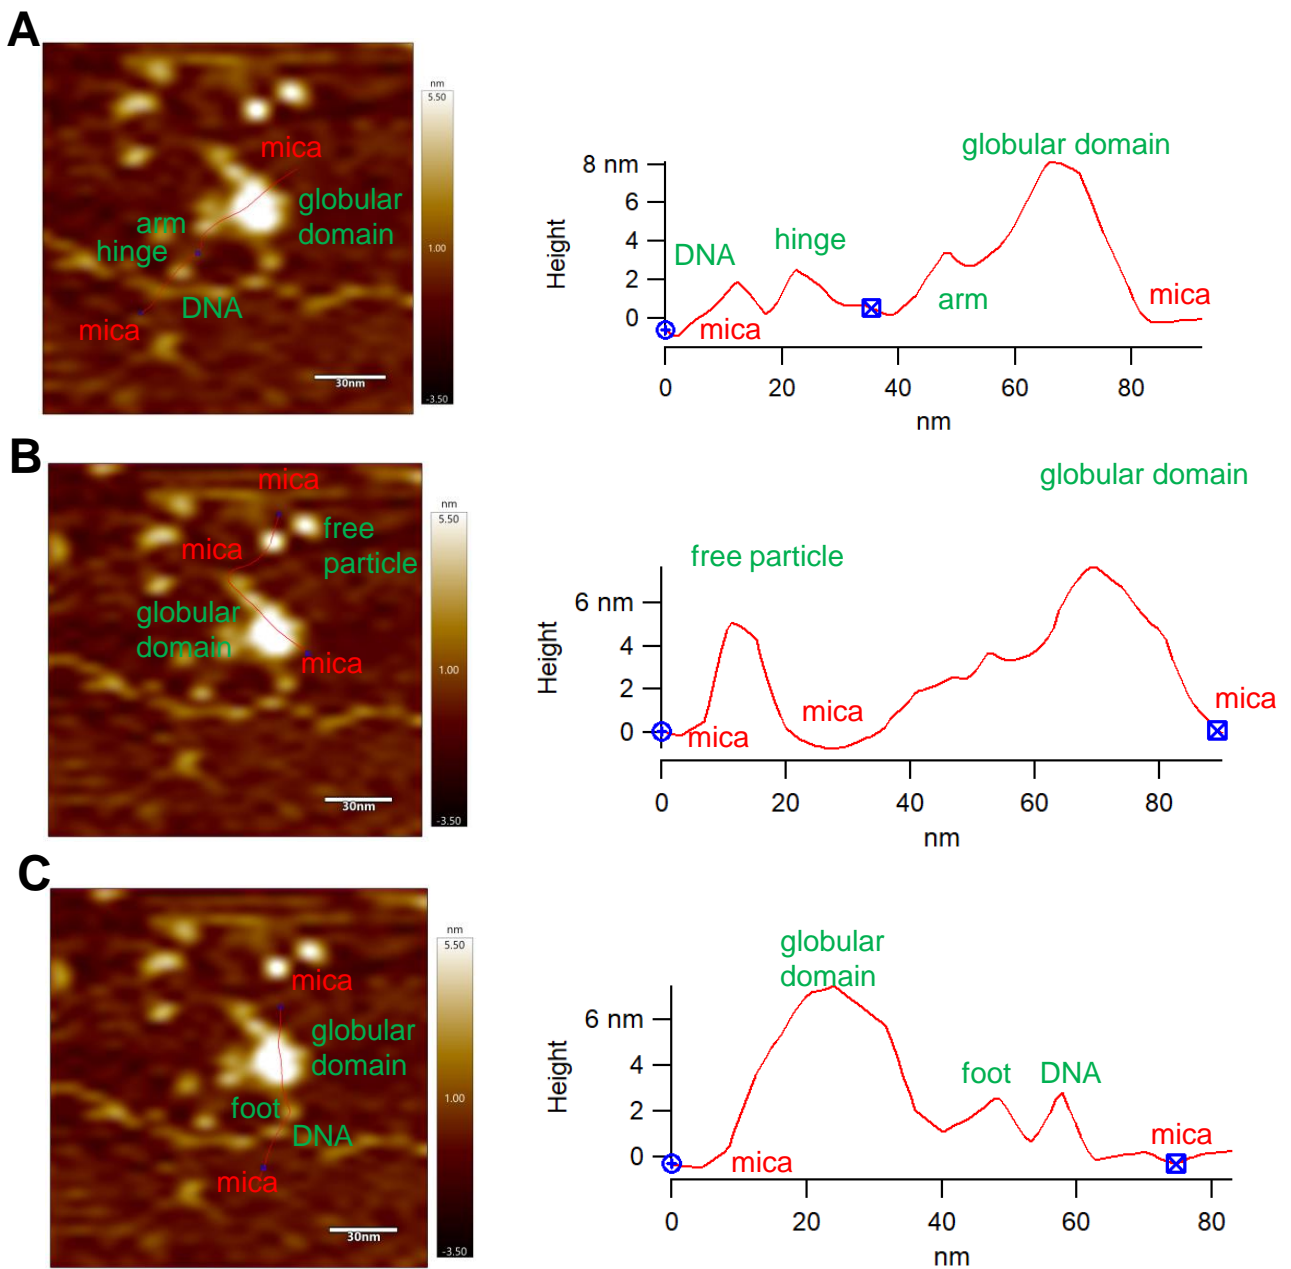

**Figure S4. AFM height profile analysis showing hinge contacting DNA (A), a free particle (B), and foot connected to the globular domain contacting the DNA (C).** Left panels: AFM images with the cross-sectional analysis lines in red and structural features labeled. Right panels: Cross-sectional analysis (height profile, red lines) with structural features labeled. Figures S4A-4C are re-use of the panel IV from Figure 3B for showing the height profiles at different regions.

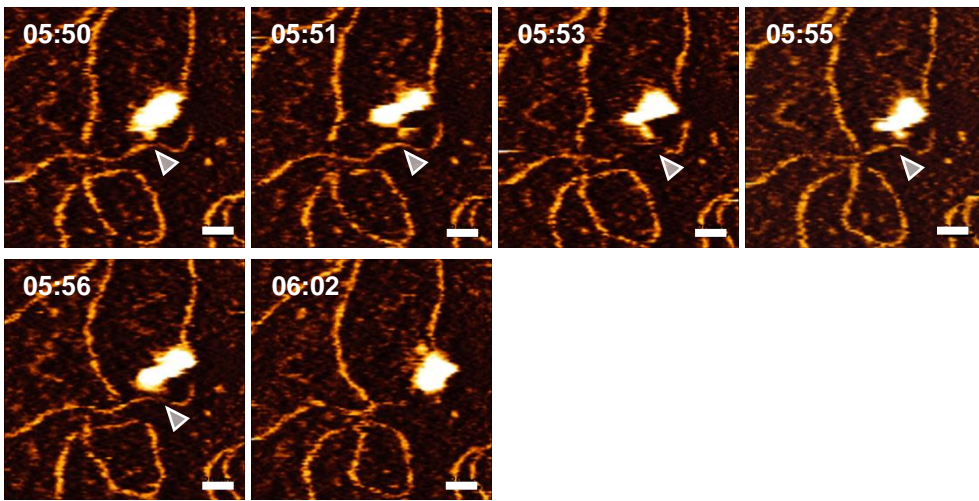

**Figure S5. Time-lapse HS-AFM images of cohesin<sup>SA1</sup>-NIPBL<sup>c</sup> ATPase mutant walking (diffusion) on DNA through short protrusions.** XY scale bar represents 20 nm. Also see **Video S3**. Observation times are in continuation of Figure 5A for the same molecules. *gray arrow: foot*. Time: min:s.

**A****Cohesin<sup>SA1dc</sup>-NIPBL**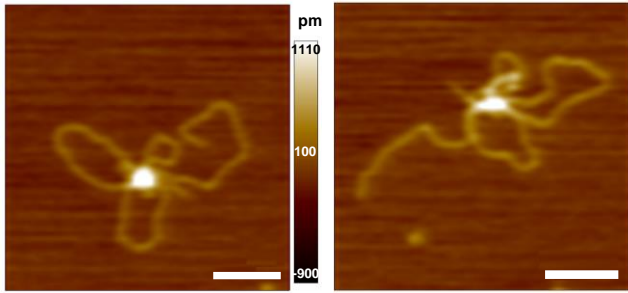**B****Cohesin<sup>SA1</sup>-NIPBLdc**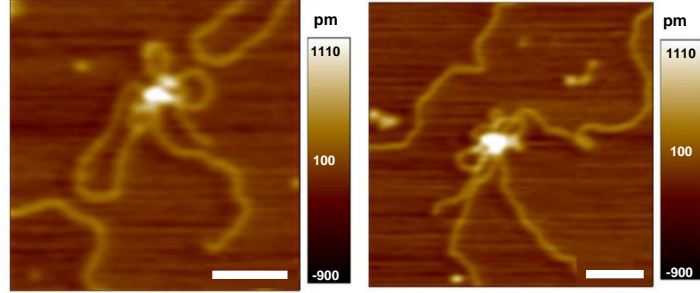**C**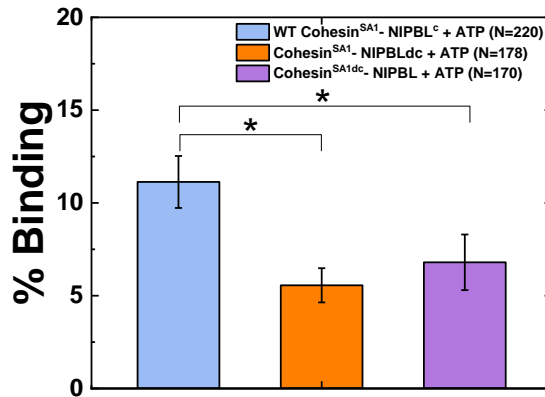**D**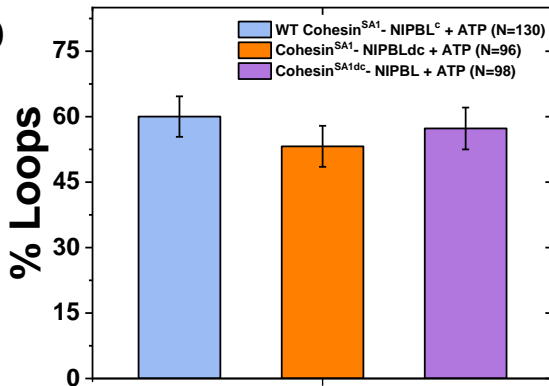**E**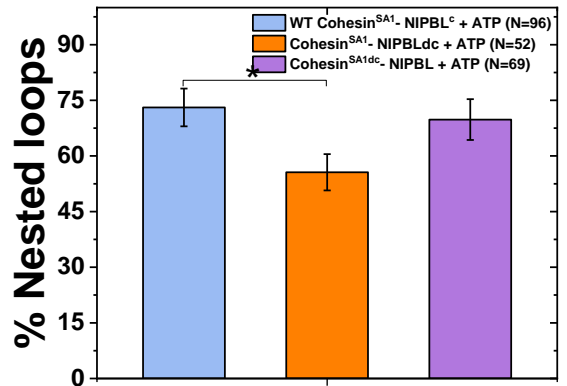

**Figure S6: DNA binding and loop formation mediated by cohesin-NIPBL missing the C-terminal domain of either SA1 or NIPBL.** *A* and *B*, Representative AFM images of DNA loops mediated by cohesin<sup>SA1dc</sup>-NIPBL (*A*) and cohesin<sup>SA1</sup>-NIPBLdc (*B*) in the absence of ATP. Cohesin<sup>SA1</sup>-NIPBL: 30 nM. DNA (5.19 kb): 6 nM. XY scale bar represents 100 nm. *C* to *E*, Quantification of the percentages of DNA molecules bound with cohesin-NIPBL molecules (*C*), DNA loops (*D*), and nested loops out of total DNA loops mediated by WT, cohesin<sup>SA1dc</sup>-NIPBL, and cohesin<sup>SA1</sup>-NIPBLdc complexes. Error bars: SD. At least 3 experiments for each condition. \*  $p < 0.05$  based on Student's t-test. The data for WT cohesin<sup>SA1</sup>-NIPBL<sup>c</sup> is from a different batch of protein compared to the data presented in Figure 6.



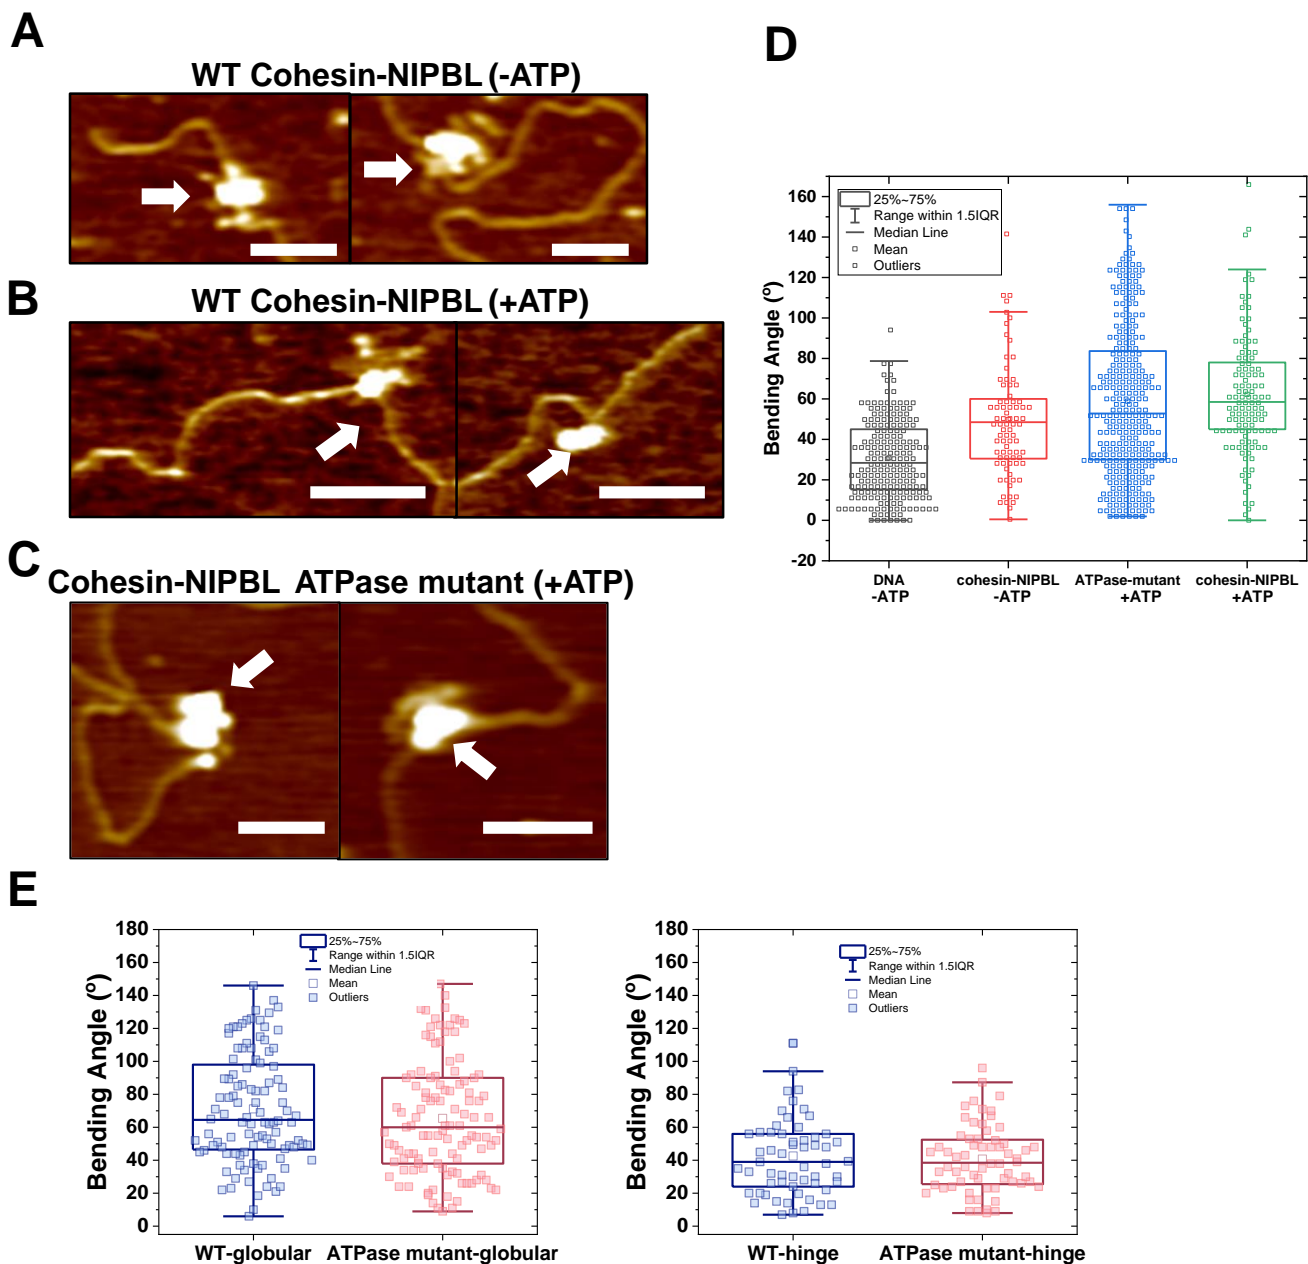

**Figure S7. Cohesin<sup>SA1</sup>-NIPBL<sup>c</sup> binding induces DNA bending.** A to C, Representative AFM images of WT cohesin<sup>SA1</sup>-NIPBL<sup>c</sup> in the absence (A), or presence of ATP (+2.5 mM, B), and cohesin<sup>SA1</sup>-NIPBL<sup>c</sup> ATPase mutant (+2.5 mM ATP, C) with dsDNA (5.19 kb). White arrows point to protein-DNA complexes. XY scale bar represents 100 nm. D, DNA bending angles induced by the WT and ATPase mutant of cohesin<sup>SA1</sup>-NIPBL<sup>c</sup> on dsDNA. DNA bending angles: 27.5° ( $\pm$  26°) for DNA<sub>+ATP</sub> (N=149), 43.7° ( $\pm$  20.5°) for DNA<sub>WT-ATP</sub> (N=80), 57.2° ( $\pm$  27.6°) for DNA<sub>WT+ATP</sub> (N=116), and 47.3° ( $\pm$  41.0°) for DNA<sub>ATPase mutant+ATP</sub> (N=298). E, DNA bending angles induced by the globular domain (left panel) of the WT (71.2°  $\pm$  33.6°, N=104) and ATPase mutant (65.4°  $\pm$  34.6°, N=111), and the hinge domain (right panel) of WT (42.6°  $\pm$  24.4°, N=59) and ATPase mutant (40.7°  $\pm$  20.3°, N=104) cohesin<sup>SA1</sup>-NIPBL<sup>c</sup>.

**A****ATPase mutant + ATP**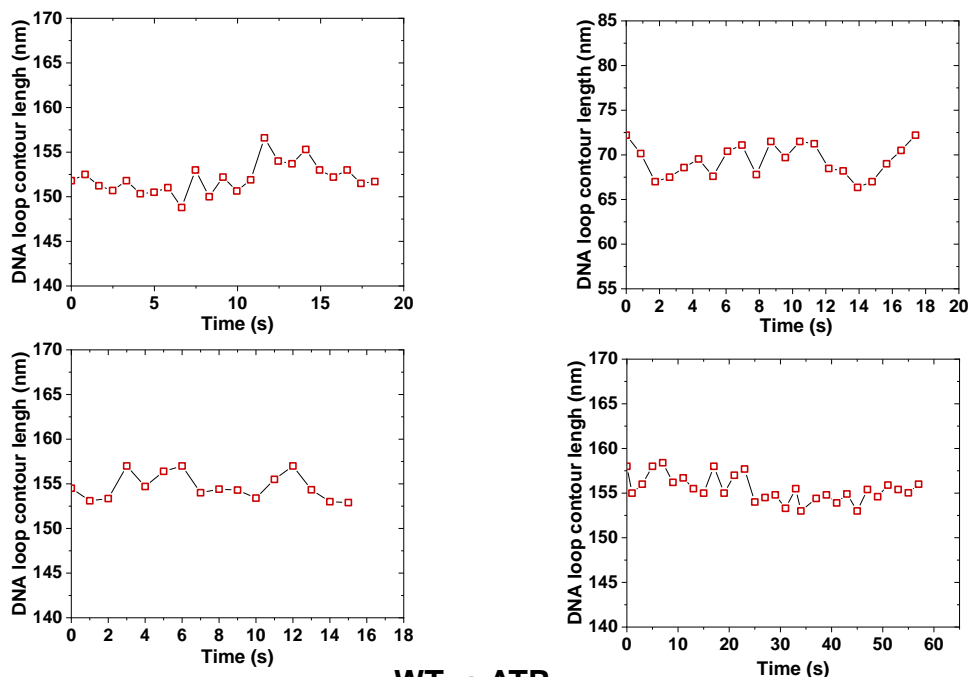**B****WT + ATP**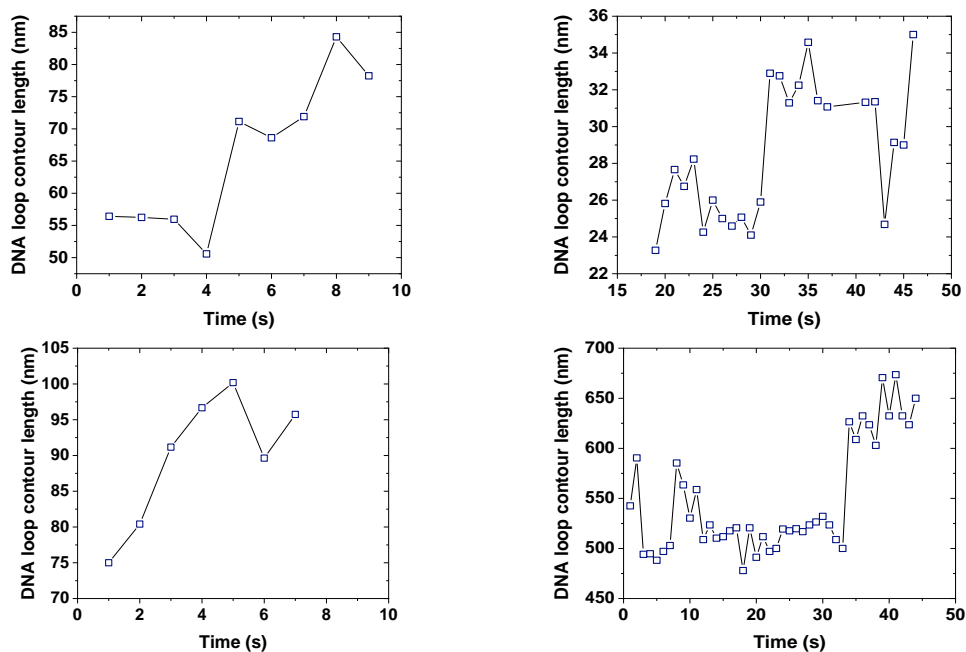

**Figure S8. DNA loop length changes mediated by the ATPase mutant and WT cohesin<sup>SA1-NIPBL<sup>c</sup></sup> on linear dsDNA in the presence of ATP . A, Frame-to-frame DNA loop lengths versus time for four independent DNA loops mediated by the cohesin<sup>SA1-NIPBL<sup>c</sup></sup> ATPase mutant (4 mM ATP). B, Additional examples of frame-to-frame DNA loop lengths versus time mediated by WT cohesin<sup>SA1-NIPBL<sup>c</sup></sup> (4 mM ATP).**
